# Supplementary material
Source: MDPI journal article supplement (https://www.mdpi.com/2073-4395/12/8/1923)
Supplement: s1 [file s1]

Table S1 Chemical and physical properties of alkali-enhanced rice straw biochars prepared at different pyrolysis temperature

| Sample                | RS    | Pyrolysis temperature | 0B    | 5KB   | 10KB   | 5K2B   | 10K2B  | 5CB   | 10CB   |
|-----------------------|-------|-----------------------|-------|-------|--------|--------|--------|-------|--------|
| pH                    | 6.19  | 350°C                 | 6.65  | 6.91  | 8.72   | 9.12   | 9.36   | 7.85  | 8.32   |
|                       |       | 450°C                 | 8.89  | 9.27  | 9.67   | 9.86   | 10.20  | 8.15  | 8.75   |
|                       |       | 550°C                 | 9.59  | 10.22 | 10.51  | 10.14  | 10.24  | 8.96  | 9.61   |
| Ash%                  | 17    | 350°C                 | 31.8  | 32.39 | 35.57  | 37.28  | 38.58  | 35.91 | 43.86  |
|                       |       | 450°C                 | 39.54 | 37.53 | 40.61  | 44.88  | 46.35  | 40.42 | 44.48  |
|                       |       | 550°C                 | 45.12 | 52.69 | 57.93  | 49.7   | 50.27  | 47.88 | 52.26  |
| C%                    | 38.82 | 350°C                 | 43.76 | 46.54 | 42.45  | 43.16  | 42.40  | 48.09 | 42.18  |
|                       |       | 450°C                 | 44.13 | 46.26 | 44.87  | 41.93  | 40.05  | 45.59 | 42.49  |
|                       |       | 550°C                 | 45.03 | 41.26 | 34.21  | 43.69  | 40.06  | 28.88 | 24.74  |
| N%                    | 1.12  | 350°C                 | 1.31  | 1.28  | 1.15   | 1.14   | 1.00   | 1.41  | 0.92   |
|                       |       | 450°C                 | 1.32  | 1.06  | 1.21   | 0.76   | 1.02   | 1.53  | 0.91   |
|                       |       | 550°C                 | 2.19  | 1.23  | 1.00   | 0.96   | 0.97   | 1.03  | 0.98   |
| P g kg <sup>-1</sup>  | 0.9   | 350°C                 | 1.31  | 0.96  | 1.07   | 1.15   | 0.81   | 1.29  | 0.80   |
|                       |       | 450°C                 | 1.45  | 1.65  | 1.05   | 1.14   | 1.62   | 1.40  | 1.20   |
|                       |       | 550°C                 | 1.84  | 1.80  | 1.75   | 1.95   | 1.56   | 1.65  | 1.34   |
| K g kg <sup>-1</sup>  | 11.72 | 350°C                 | 14.56 | 64.67 | 92.22  | 64.18  | 109.68 | 10.14 | 8.46   |
|                       |       | 450°C                 | 17.58 | 69.07 | 103.66 | 106.27 | 140.73 | 12.88 | 12.42  |
|                       |       | 550°C                 | 16.09 | 86.02 | 138.46 | 89.71  | 137.74 | 14.56 | 14.36  |
| Ca g kg <sup>-1</sup> | 1.9   | 350°C                 | 3.27  | 2.27  | 2.44   | 4.02   | 1.62   | 59.95 | 80.91  |
|                       |       | 450°C                 | 4.59  | 3.50  | 3.87   | 3.42   | 1.69   | 49.16 | 105.51 |
|                       |       | 550°C                 | 4.45  | 4.47  | 4.39   | 2.66   | 2.37   | 67.4  | 117.24 |
| Mg g kg <sup>-1</sup> | 1.75  | 350°C                 | 0.59  | 0.43  | 0.56   | 0.6    | 0.27   | 1.41  | 1.72   |
|                       |       | 450°C                 | 0.60  | 0.82  | 0.69   | 0.68   | 0.32   | 2.06  | 2.09   |
|                       |       | 550°C                 | 3.15  | 3.09  | 3.09   | 1.11   | 0.28   | 2.85  | 2.7    |
| Zn g kg <sup>-1</sup> | 0.06  | 350°C                 | 0.09  | 0.09  | 0.14   | 0.06   | 0.09   | 0.18  | 0.21   |
|                       |       | 450°C                 | 0.18  | 0.09  | 0.15   | 0.1    | 0.14   | 0.19  | 0.26   |
|                       |       | 550°C                 | 0.11  | 0.12  | 0.24   | 0.09   | 0.09   | 0.61  | 0.49   |

Note: RS, rice straw; 0KB, 5KB/K2B/CB, 10KB/K2B/CB indicate the biochars prepared at the proportion of KOH/K<sub>2</sub>CO<sub>3</sub>/CaO to feedstock of 0:100, 5:100, 10:100. 350, 450, 550°C indicate pyrolysis temperature.

Table S2 Chemical and physical properties of alkali-enhanced rice husk biochars prepared at different pyrolysis temperature

| Sample                | RH    | Pyrolysis temperature | 0B    | 5KB   | 10KB   | 5K2B  | 10K2B | 5CB   | 10CB   |
|-----------------------|-------|-----------------------|-------|-------|--------|-------|-------|-------|--------|
| pH                    | 6.23  | 350°C                 | 6.46  | 6.89  | 7.78   | 8.41  | 8.9   | 7.27  | 9.44   |
|                       |       | 450°C                 | 7.99  | 9.3   | 9.74   | 9.9   | 10.01 | 8.8   | 9.52   |
|                       |       | 550°C                 | 8.58  | 9.95  | 10.08  | 10.01 | 10.24 | 9.41  | 9.65   |
| Ash%                  | 19.39 | 350°C                 | 33.55 | 34.57 | 34.8   | 36.8  | 38.66 | 38.03 | 40.47  |
|                       |       | 450°C                 | 39.36 | 41    | 43.87  | 43.12 | 46.23 | 42.58 | 49.81  |
|                       |       | 550°C                 | 44.36 | 46.07 | 47.7   | 47.77 | 48.14 | 50.35 | 54.91  |
| C%                    | 36.97 | 350°C                 | 41.08 | 38.97 | 35.85  | 40.57 | 39.47 | 38.16 | 38.79  |
|                       |       | 450°C                 | 43.25 | 39.42 | 35.18  | 41.19 | 39.98 | 40.68 | 37.27  |
|                       |       | 550°C                 | 44.85 | 41.28 | 35.08  | 41.61 | 41.51 | 41.62 | 32.66  |
| N%                    | 0.59  | 350°C                 | 0.8   | 0.84  | 0.63   | 0.94  | 0.77  | 0.48  | 0.73   |
|                       |       | 450°C                 | 0.99  | 0.49  | 0.62   | 0.67  | 0.63  | 0.61  | 0.51   |
|                       |       | 550°C                 | 0.71  | 0.67  | 0.49   | 0.7   | 0.6   | 0.48  | 0.33   |
| P g kg <sup>-1</sup>  | 0.21  | 350°C                 | 0.91  | 0.87  | 2.33   | 3.37  | 0.84  | 1.56  | 3.05   |
|                       |       | 450°C                 | 1.15  | 0.78  | 0.68   | 0.82  | 1.06  | 0.83  | 0.63   |
|                       |       | 550°C                 | 0.68  | 2.28  | 1.59   | 0.82  | 0.88  | 4     | 2.12   |
| K g kg <sup>-1</sup>  | 1.61  | 350°C                 | 3.18  | 42.76 | 65.34  | 40.14 | 70.73 | 2.99  | 2.32   |
|                       |       | 450°C                 | 3.75  | 53.87 | 96.31  | 64.28 | 92.38 | 3.28  | 3.19   |
|                       |       | 550°C                 | 4.99  | 64.25 | 106.21 | 64.51 | 99.16 | 4.72  | 4.06   |
| Ca g kg <sup>-1</sup> | 0.91  | 350°C                 | 1.21  | 0.88  | 0.89   | 0.88  | 0.79  | 45.06 | 81.91  |
|                       |       | 450°C                 | 1.31  | 1.06  | 0.88   | 0.96  | 0.9   | 55.37 | 106.71 |
|                       |       | 550°C                 | 1.17  | 1.09  | 0.95   | 0.93  | 0.72  | 54.74 | 102.03 |
| Mg g kg <sup>-1</sup> | 0.16  | 350°C                 | 0.41  | 0.14  | 0.13   | 0.11  | 0.05  | 0.73  | 0.6    |
|                       |       | 450°C                 | 0.59  | 0.25  | 0.14   | 0.13  | 0.07  | 0.76  | 0.82   |
|                       |       | 550°C                 | 0.53  | 0.21  | 0.15   | 0.12  | 0.03  | 0.96  | 0.92   |
| Zn g kg <sup>-1</sup> | 0.12  | 350°C                 | 0.31  | 0.09  | 0.08   | 0.03  | 0.03  | 0.41  | 0.28   |
|                       |       | 450°C                 | 0.36  | 0.19  | 0.08   | 0.05  | 0.04  | 0.41  | 0.36   |
|                       |       | 550°C                 | 0.35  | 0.12  | 0.1    | 0.05  | 0.01  | 0.56  | 0.43   |

Note: RH, rice husk; 0KB, 5KB/K2B/CB, 10KB/K2B/CB indicate the biochars prepared at the proportion of KOH/K<sub>2</sub>CO<sub>3</sub>/CaO to feedstock of 0:100, 5:100, 10:100. 350, 450, 550°C indicate pyrolysis temperature.
